# Supplementary material for: Photoinduced alkyl group exchange of ethylzinc alkoxides: X-ray crystal structure of an iodomethylzinc methoxide
Source: Royal Society of Chemistry journal article supplement (doi:10.1039/b110736d), 2002-01-01
Supplement: b110736d.doc [file b110736d.doc]

**Photoinduced alkyl group exchange of ethylzinc alkoxides: X-ray crystal structure of iodomethylzinc methoxide****

André B. Charette,* André Beauchemin, Sébastien Francoeur, Francine Bélanger-Gariépy, and Gary D. Enright

**Supplementary Information**

**Experimental Section**

Dichloromethane-*d*2 (~ 0.7 mL) and 1,2-dimethoxyethane (0.036 mL, 0.35 mmol) were added in a previously purged NMR tube, under argon. The tube was capped with a septum and secured with Teflon® tape. Diethylzinc (0.036 mL, 0.35 mmol) and methanol (0.0142 mL, 0.35 mmol) were then added at room temperature and gas evolution was observed. The tube was shook twice and diiodomethane (0.026 mL, 0.35 mmol) was added after at least 5 minutes. The tube was shook twice and the colorless solution was irradiated at room temperature using a 300 W sunlamp (OSRAM, Ultra-Vitalux). The lamp was placed at a distance of 20 cm from the NMR tube in order to avoid sample warming and loss of solvent. The solution was irradiated for 45 minutes and then analyzed by NMR, showing complete conversion and the presence of different aggregates in solution. 1H NMR (400 MHz, CD2Cl2)  3.92 (s, 3H), 3.91 (s, 3H), 3.88 (s, 3H), 3.85 (s, 3H), 1.50 (s, 2H), 1.48 (s, 2H), 1.47 (s, 2H), 1.36 (s, 2H); 13C NMR (100 MHz, CD2Cl2)  57.9, 56.8, –20.6, –31.4, –32.8. Colorless crystals generally deposited within 3 hours. Once the crystals were deposited, the NMR tube was kept at –78 ˚C while waiting for X-ray analysis.

**Iodomethylzinc methoxyde (NMR in solution)**

**Figure 1.** 1H NMR before and after irradiation of the solution

**Iodomethylzinc methoxyde (NMR in the solid-state)**

The procedure described in the experimental section was repeated, using dichloromethane (1.0 mL), 1,2-dimethoxyethane (0.104 mL, 1.00 mmol), diethylzinc (0.0512 mL, 0.50 mmol), methanol (0.0203 mL, 0.50 mmol) and diiodomethane (0.0403 mL, 0.50 mmol). The solution was irradiated 1 hour with a 300 W sunlamp (OSRAM, Ultra-Vitalux) and routinely crystals deposited before the end of the irration. This procedure was repeated 11 times on the same scale to afford colorless crystals (suitable for X-ray analysis) in 9 cases. After introduction of the samples in the glove-box, the crystals were then combined, solvent was removed and the solid was grind to a fine powder (~0.6 g). The solid was dried under a nitrogen stream and inserted into the sample holder. 13C CP-MAS NMR (75 MHz)  62, 56, –24 (s, broad).

**Figure 2.** 13C CP-MAS NMR of (MeO)8Zn7(CH2I)6

Dichloromethane-*d*2 (~0.7 mL) and 1,2-dimethoxyethane (0.036 mL, 0.35 mmol) were added in a previously purged NMR tube, under argon. The tube was capped with a septum and secured with Teflon tape. Diethylzinc (0.036 mL, 0.35 mmol) and ethylene glycol (0.010 mL, 0.18 mmol) were then added at room temperature and gas evolution was observed. The tube was shook twice and diiodomethane (0.028 mL, 0.35 mmol) was added after at least 5 minutes. The tube was shook twice and then irradiated at room temperature using a 300 W sunlamp (OSRAM, Ultra-Vitalux). The lamp was placed at a distance of 20 cm from the NMR tube in order to avoid sample warming and loss of solvent. The solution was irradiated for 60 minutes. Benzene (0.031 mL, 0.35 mmol) was then added as an internal standard and the solution was analyzed by NMR. Complete disappearance of the CH2I2 and formation of 2 equivalents of ethyl iodide (using the benzene peak as an internal standard) were observed.

Dichloromethane-*d*2 (~0.7 mL) and 1,2-dimethoxyethane (0.036 mL, 0.35 mmol) were added in a previously purged NMR tube, under argon. The tube was capped with a septum and secured with Teflon tape. Diethylzinc (0.036 mL, 0.35 mmol) and ethylene glycol (0.010 mL, 0.18 mmol) were then added at room temperature and gas evolution was observed. The tube was shook twice and diiodomethane (0.014 mL, 0.18 mmol) was added after at least 5 minutes. The tube was shook twice and then irradiated at room temperature using a 300 W sunlamp (OSRAM, Ultra-Vitalux). The lamp was placed at a distance of 20 cm from the NMR tube in order to avoid sample warming and loss of solvent. The solution was irradiated for 60 minutes. Benzene (0.031 mL, 0.35 mmol) was then added as an internal standard and the solution was analyzed by NMR. Complete disappearance of the CH2I2 and formation of 2 equivalents of ethyl iodide (using the benzene peak as an internal standard) were observed.
